# Supplementary material
Source: ML conference proceedings conference paper supplement (https://openreview.net/forum?id=tuch82hlmx)
Supplement: supplementary_material [file attachment]

# Supplementary Materials

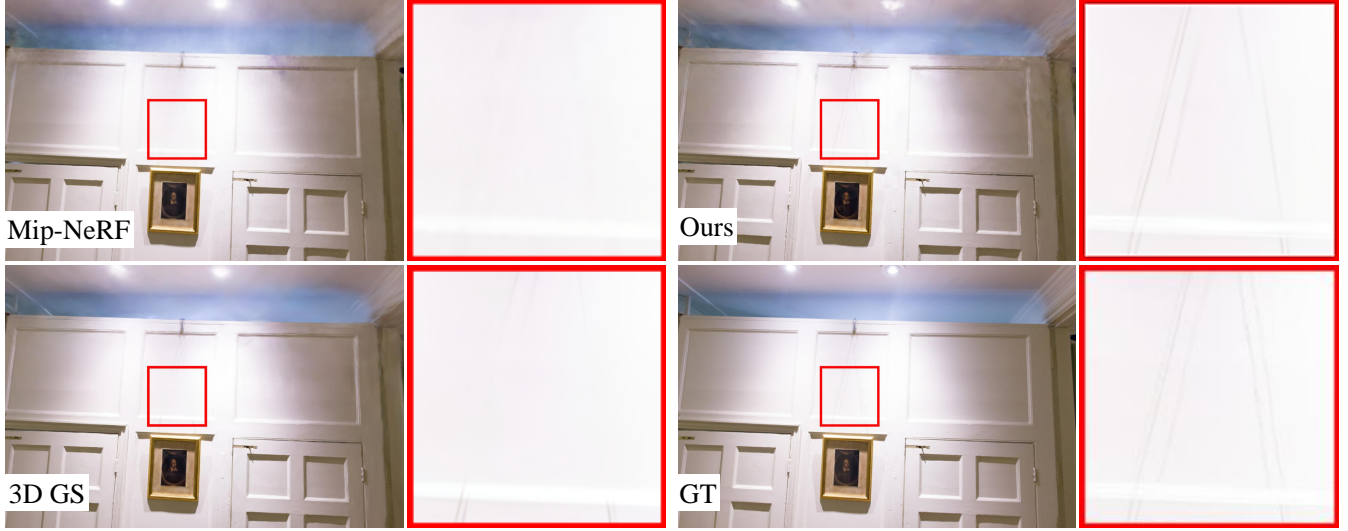

Figure 1: The visualization results of *Dr Johnson* scene from Deep Blending.

## 1 ADDITIONAL RESULTS

Details of the results of the experiments in the main text. Tab. 2, Tab. 3, Tab. 4, Tab. 5, Tab. 6, Tab. 7, Tab. 8 and Tab. 9 provide a breakdown of the results from Tab. 1 and 2 in the main body, presenting metrics for each scene individually, where bold indicates the best result. 3D-GS\* is the model we retrained at a scale threshold of 0.001. Except for the indoor scenes of the Mip-NeRF360 dataset, our method improves on all metrics, especially the LPIPS metric. It is worth noting that compared to PSNR and SSIM, LPIPS is more in line with human eye’s perception and more sensitive to over-reconstruction. In addition, our method has significant advantages in memory consumption compared to 3D-GS. Tab. 1 shows the detailed metrics for Fig. 9 in the main body. Fig. 4

Fig. 4 displays some results of the novel view synthesis and point clouds. Our method exhibits a clear advantage in terms of point cloud complementation, particularly in over-reconstructed regions. Even with a significantly lower number of point clouds than 3D-GS in Abs-0008, it outperforms 3D-GS. The comparison for Scene *Truck* is not as obvious, primarily because this scene has a better initial point cloud quality and lower image resolution, making the original over-reconstructed regions of 3D-GS less conspicuous.

Fig. 1 illustrates the visualization results at each threshold. As the threshold increases, the over-reconstruction problem in the yellow box improves, but the area in the blue box remains almost unchanged.

*Detail Comparison.* Fig. 3 and 1 demonstrate the advantage of our approach in detail representation. In the TRAIN scene, 3DGS almost loses the texture details in the background. Additionally, only our method reconstructs the thin black lines in the *Dr Johnson* scene from Deep Blending.

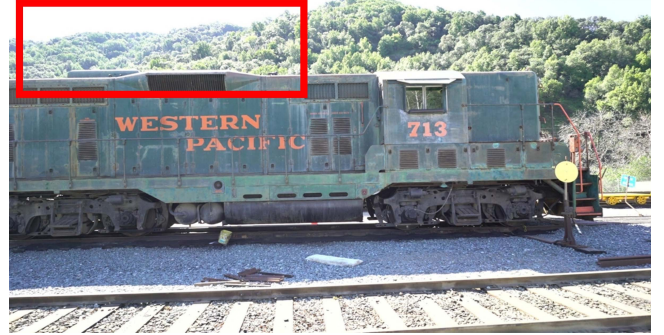

(a) Ground truth with annotation

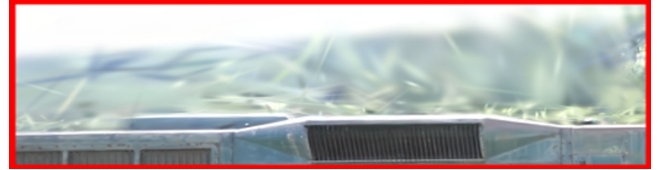

(b) 3D-GS

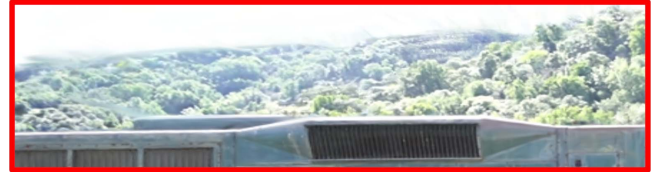

(c) Ours

Figure 3: The visualization results of *train* scene from *Tanks & Temples*. 3D-GS shows a significant over-reconstruction at the background.

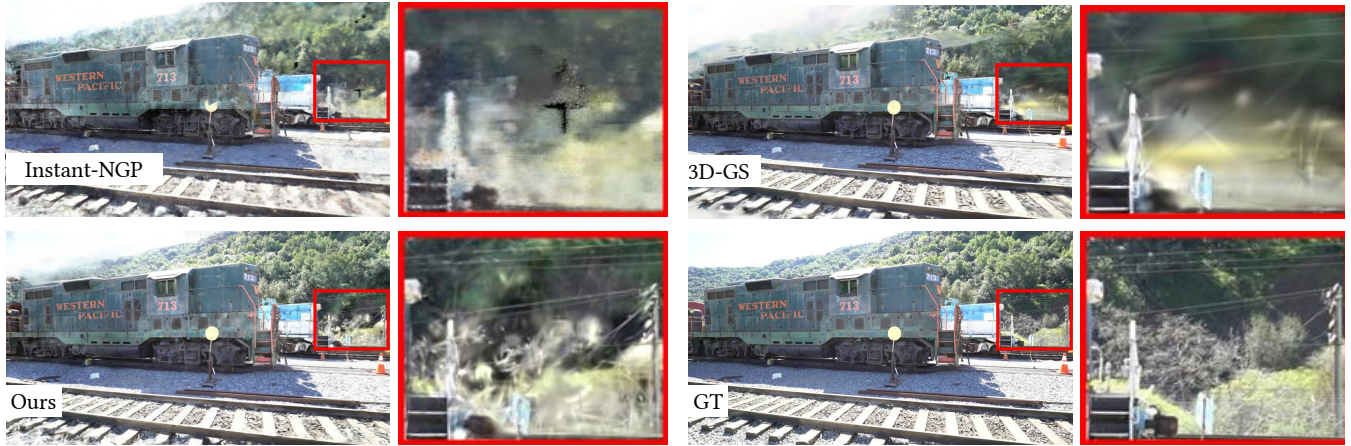

**Figure 2: Qualitative comparisons of different methods on less-observed and distant regions. Our proposed AbsGS recovers more detail even when few observations are available, while other methods produce blurry and low-resolution renderings.**

*Impact of Scale Thresholds.* Fig. 5 illustrates the comparison of the results of 3D-GS and AbsGS about scene *bicycle* under different scale thresholds ( $\tau_s$ ). In the main body, we demonstrate the effect of different scale thresholds on our method, illustrating how a scale threshold that is too large can limit our method’s potential. As shown in Fig. 5, 3D-GS does not eliminate over-reconstruction by lowering the scale threshold, indicating that the effectiveness of our method is not solely due to lowering the scale threshold.

In addition, lowering the threshold brings an unexpected benefit: the distribution of the point cloud is more rational. All methods in Fig. 5 exhibit more complete bicycle point clouds at small scale thresholds, particularly for bicycle spokes (the yellow circle in the Fig. 5). We explain this phenomenon with Fig. 7, where a large scale threshold limits the splitting of the Gaussian, tending to expand the Gaussian radius to represent the scene when the regions are of the same color. This benefit does not come from AbsGS. The contribution of AbsGS is to fill in the missing point clouds, see the point clouds in the yellow box in Fig. 5. Lowering the scale threshold is only effective for regions of the same color and does not fill in the empty shortcoming clouds in over-reconstructed regions.

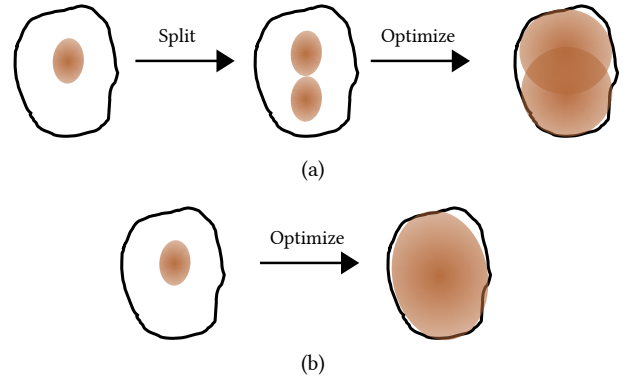

**Figure 7: Effect of small-scale threshold on the distribution of point clouds in the region with a single color. (a) At small threshold, the Gaussian splits into multiple Gaussian co-expression regions, resulting in a denser point cloud. (b) Large threshold limits the splitting of the Gaussian and tends to express the whole region using a large Gaussian, resulting in a sparse point cloud.**

**Table 1: The results of the flowers scene under different gradient thresholds for 3D-GS.**

|       | 0.0002 | 0.00018 | 0.00016 | 0.00014 | 0.00012 | 0.0001 |
|-------|--------|---------|---------|---------|---------|--------|
| SSIM  | 0.600  | 0.611   | 0.618   | 0.624   | 0.628   | 0.636  |
| PSNR  | 21.463 | 21.633  | 21.714  | 21.752  | 21.762  | 21.920 |
| LPIPS | 0.341  | 0.326   | 0.319   | 0.308   | 0.299   | 0.286  |
| Mem   | 864MB  | 1018MB  | 1219MB  | 1487MB  | 1889MB  | 2466MB |

**Table 2: Per-scene quantitative results(SSIM) from the Mip-NeRF360.**

|             |            | bicycle      | flowers      | garden       | stump        | treehill     | room         | counter      | kitchen       | bonsai       |
|-------------|------------|--------------|--------------|--------------|--------------|--------------|--------------|--------------|---------------|--------------|
| Plenoxels   |            | 0.496        | 0.431        | 0.606        | 0.523        | 0.509        | 0.8417       | 0.759        | 0.648         | 0.814        |
| INGP-Base   |            | 0.491        | 0.450        | 0.649        | 0.574        | 0.518        | 0.855        | 0.798        | 0.818         | 0.890        |
| INGP-Big    |            | 0.512        | 0.486        | 0.701        | 0.594        | 0.542        | 0.871        | 0.817        | 0.858         | 0.906        |
| Mip-NeRF360 |            | 0.685        | 0.583        | 0.813        | 0.744        | 0.632        | 0.913        | 0.894        | 0.920         | 0.941        |
| 3D-GS       |            | 0.771        | 0.605        | 0.868        | 0.775        | <b>0.638</b> | 0.914        | 0.905        | 0.922         | 0.938        |
| 3D-GS*      |            | 0.759        | 0.596        | 0.858        | 0.762        | 0.625        | 0.917        | 0.905        | 0.924         | 0.939        |
| S=0.01      | AbsGS-0008 | 0.778        | 0.619        | 0.860        | 0.782        | 0.629        | 0.918        | 0.902        | 0.923         | 0.938        |
| S=0.001     | AbsGS-0008 | 0.773        | 0.612        | 0.863        | 0.770        | 0.621        | 0.919        | 0.906        | 0.925         | 0.941        |
| S=0.01      | AbsGS-0004 | 0.782        | 0.613        | 0.870        | <b>0.784</b> | 0.626        | 0.920        | 0.908        | 0.929         | 0.944        |
| S=0.001     | AbsGS-0004 | <b>0.783</b> | <b>0.623</b> | <b>0.871</b> | 0.780        | 0.617        | <b>0.925</b> | <b>0.911</b> | <b>0.9293</b> | <b>0.945</b> |

**Table 3: Per-scene quantitative results(PSNR) from the Mip-NeRF360.**

|             |            | bicycle       | flowers      | garden        | stump         | treehill     | room         | counter      | kitchen      | bonsai       |
|-------------|------------|---------------|--------------|---------------|---------------|--------------|--------------|--------------|--------------|--------------|
| Plenoxels   |            | 21.912        | 20.097       | 23.495        | 20.661        | 22.248       | 27.594       | 23.624       | 23.420       | 24.669       |
| INGP-Base   |            | 22.193        | 20.348       | 24.599        | 23.626        | 22.364       | 29.269       | 26.439       | 28.548       | 30.337       |
| INGP-Big    |            | 22.171        | 20.652       | 25.069        | 23.466        | 22.373       | 29.690       | 26.691       | 29.479       | 30.685       |
| Mip-NeRF360 |            | 24.37         | <b>21.73</b> | 26.98         | 26.40         | <b>22.87</b> | <b>31.63</b> | <b>29.55</b> | <b>32.23</b> | <b>33.46</b> |
| 3D-GS       |            | 25.246        | 21.520       | 27.410        | 26.550        | 22.490       | 30.632       | 28.700       | 30.317       | 31.980       |
| 3D-GS*      |            | 25.12         | 21.439       | 27.11         | 26.457        | 22.385       | 31.35        | 28.93        | 31.312       | 32.11        |
| S=0.01      | AbsGS-0008 | 25.326        | 21.54        | 27.327        | 26.763        | 22.230       | 31.475       | 28.828       | 31.299       | 31.615       |
| S=0.001     | AbsGS-0008 | 25.248        | 21.468       | 27.375        | 26.594        | 22.215       | 31.331       | 28.960       | 31.485       | 32.046       |
| S=0.01      | AbsGS-0004 | <b>25.373</b> | 21.298       | <b>27.579</b> | <b>26.766</b> | 22.074       | 31.582       | 28.968       | 31.774       | 32.283       |
| S=0.001     | AbsGS-0004 | 25.290        | 21.347       | 27.487        | 26.711        | 21.986       | 31.614       | 29.031       | 31.621       | 32.323       |

**Table 4: Per-scene quantitative results(LPIPS) from the Mip-NeRF360.**

|             |            | bicycle      | flowers      | garden       | stump        | treehill     | room         | counter      | kitchen      | bonsai       |
|-------------|------------|--------------|--------------|--------------|--------------|--------------|--------------|--------------|--------------|--------------|
| Plenoxels   |            | 0.506        | 0.521        | 0.386        | 0.503        | 0.540        | 0.4186       | 0.441        | 0.447        | 0.398        |
| INGP-Base   |            | 0.487        | 0.481        | 0.312        | 0.450        | 0.489        | 0.301        | 0.342        | 0.254        | 0.227        |
| INGP-Big    |            | 0.446        | 0.441        | 0.257        | 0.421        | 0.450        | 0.261        | 0.306        | 0.195        | 0.205        |
| Mip-NeRF360 |            | 0.301        | 0.344        | 0.170        | 0.261        | 0.339        | 0.211        | 0.204        | 0.127        | <b>0.176</b> |
| 3D-GS       |            | 0.205        | 0.336        | 0.103        | 0.210        | 0.317        | 0.220        | 0.204        | 0.129        | 0.205        |
| 3D-GS*      |            | 0.214        | 0.341        | 0.113        | 0.220        | 0.337        | 0.220        | 0.203        | 0.129        | 0.206        |
| S=0.01      | AbsGS-0008 | 0.199        | 0.312        | 0.118        | 0.212        | 0.308        | 0.218        | 0.218        | 0.131        | 0.207        |
| S=0.001     | AbsGS-0008 | 0.194        | 0.310        | 0.118        | 0.215        | 0.309        | 0.217        | 0.203        | 0.130        | 0.202        |
| S=0.01      | AbsGS-0004 | 0.186        | 0.295        | 0.104        | 0.202        | 0.297        | 0.216        | 0.198        | 0.124        | 0.194        |
| S=0.001     | AbsGS-0004 | <b>0.171</b> | <b>0.270</b> | <b>0.100</b> | <b>0.195</b> | <b>0.278</b> | <b>0.200</b> | <b>0.189</b> | <b>0.121</b> | 0.190        |



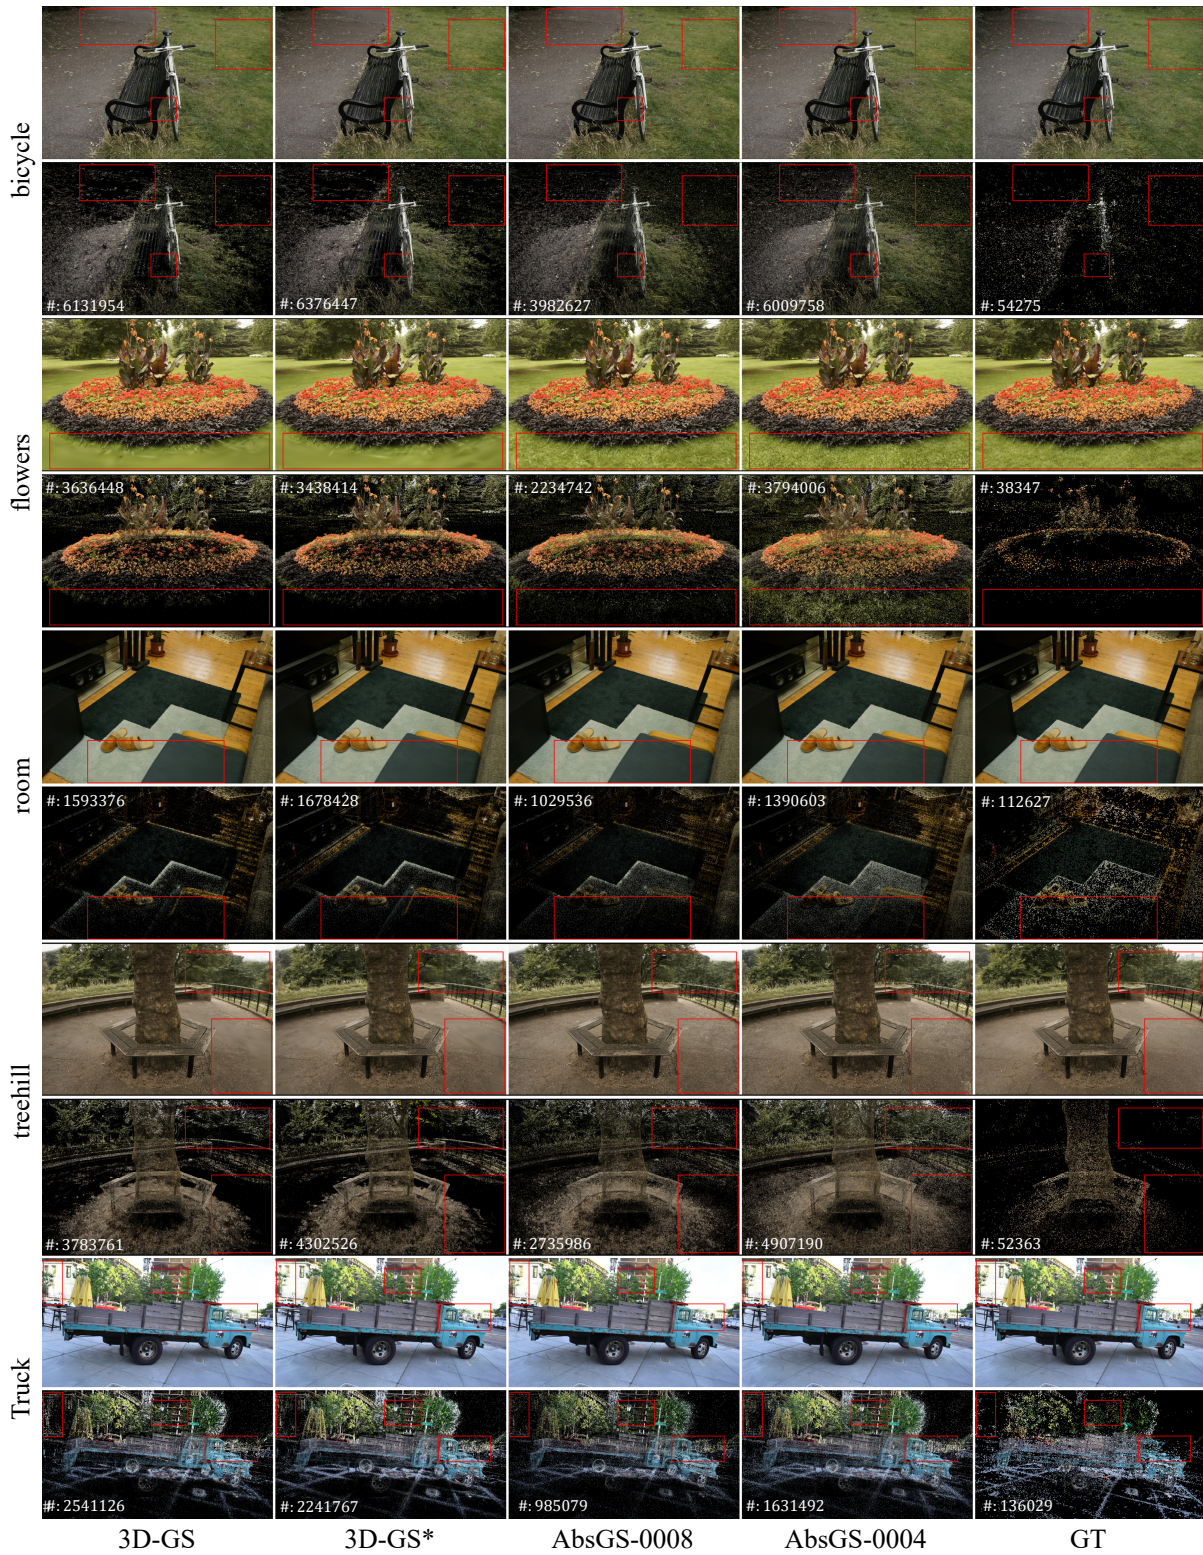

Figure 4: Comparison of novel view synthesis quality and point clouds in different scenes. Ground truth point cloud represents the point cloud of SfM



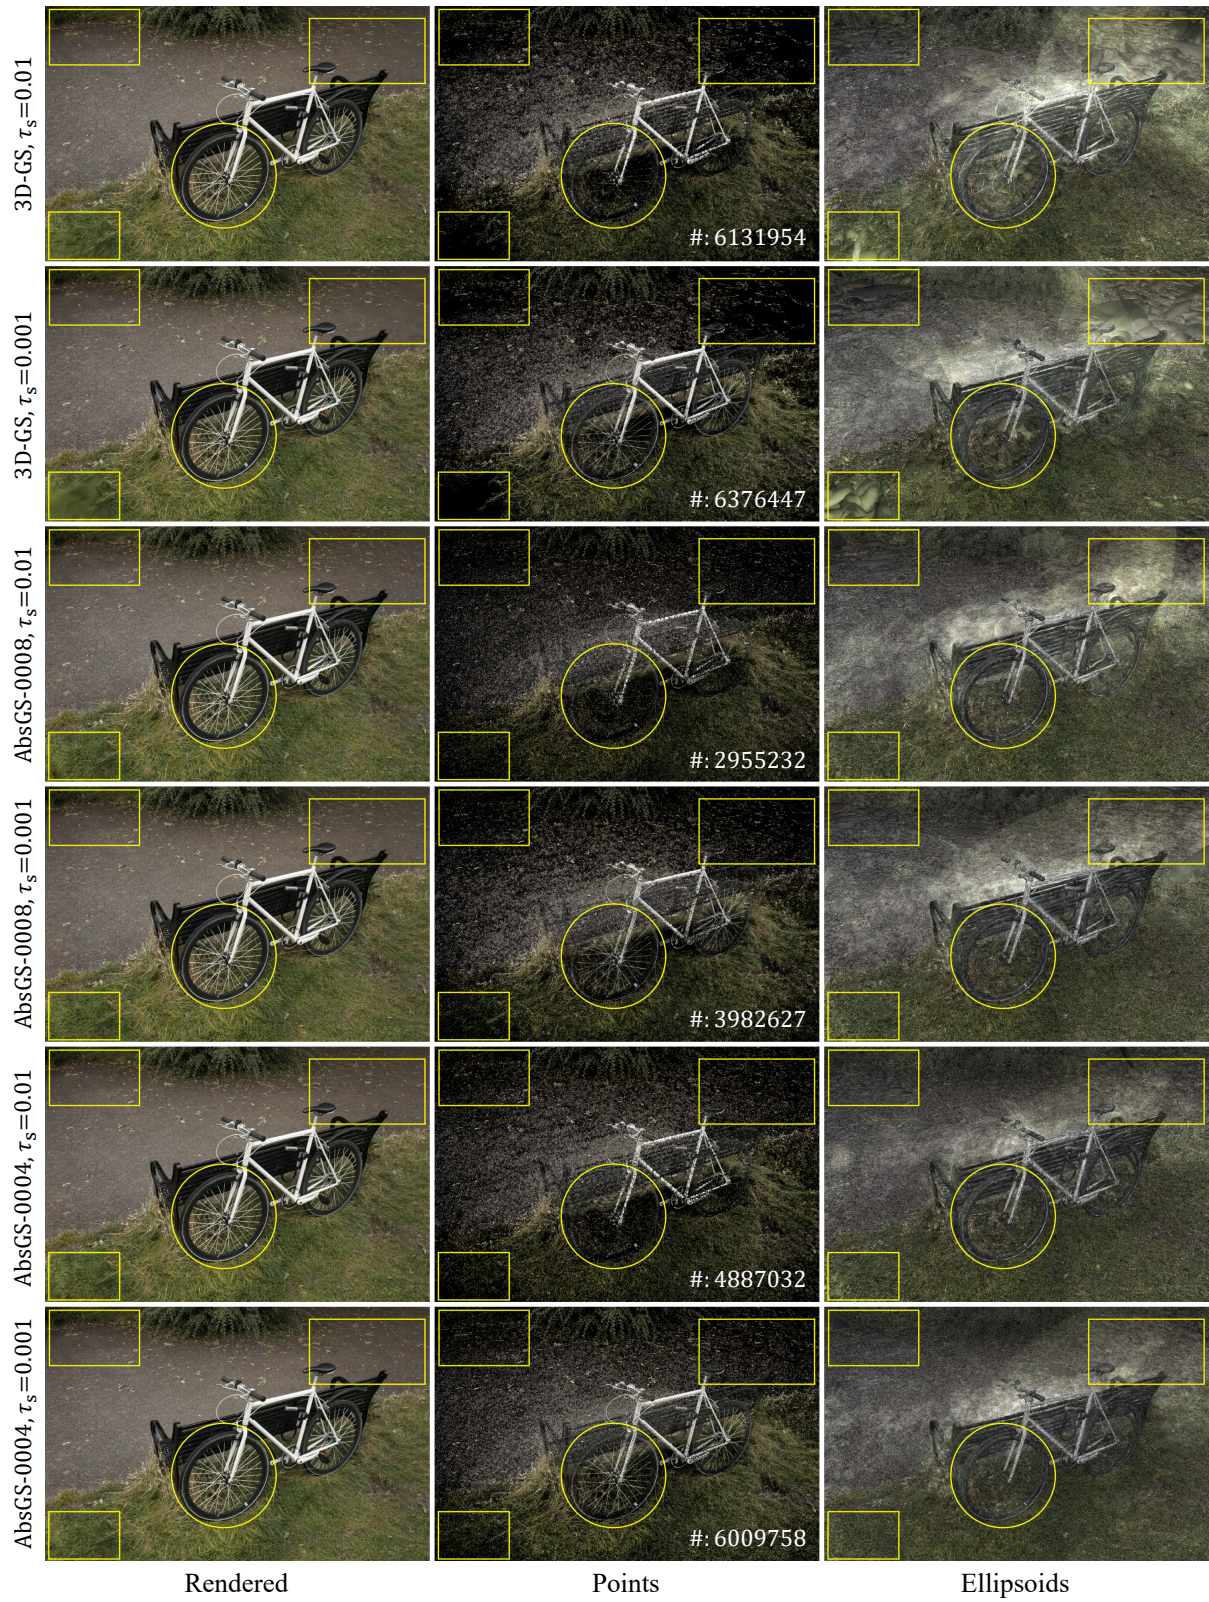

Figure 5: Comparison of 3D-GS and AbsGS results about scene *bicycle* under different thresholds



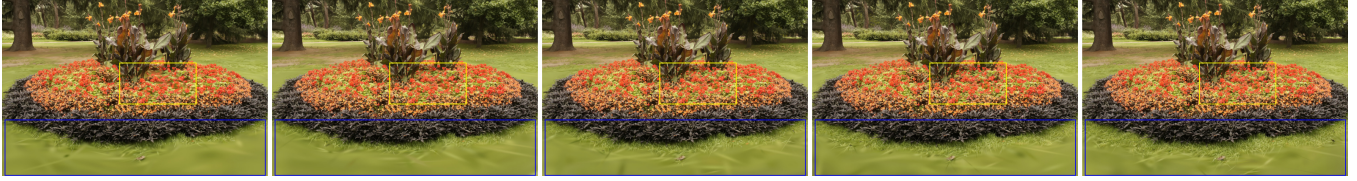

Figure 6: Rendered images of 3D-GS on *flowers* scene with different gradient thresholds. From left to right, the threshold gradually decreases.

Table 5: Per-scene memory consumption(MB) from the Mip-NeRF360.

|         |            | bicycle | flowers | garden | stump | treehill | room | counter | kitchen | bonsai |
|---------|------------|---------|---------|--------|-------|----------|------|---------|---------|--------|
| 3D-GS*  |            | 1508    | 813     | 1073   | 1100  | 1018     | 397  | 257     | 412     | 259    |
| S=0.01  | AbsGS-0008 | 699     | 439     | 506    | 543   | 543      | 198  | 125     | 183     | 132    |
| S=0.001 | AbsGS-0008 | 941     | 529     | 584    | 601   | 647      | 243  | 145     | 213     | 150    |
| S=0.01  | AbsGS-0004 | 1156    | 751     | 932    | 1021  | 962      | 234  | 192     | 249     | 234    |
| S=0.001 | AbsGS-0004 | 1421    | 897     | 900    | 1103  | 1161     | 329  | 225     | 274     | 241    |

Table 6: Per-scene quantitative results(SSIM) from the Tanks & Temples and Deep Blending.

|         |             | Truck        | Train        | Dr Johnson   | Playroom      |
|---------|-------------|--------------|--------------|--------------|---------------|
|         | Plenoxels   | 0.774        | 0.663        | 0.787        | 0.802         |
|         | INGP-Base   | 0.779        | 0.666        | 0.839        | 0.754         |
|         | INGP-Big    | 0.800        | 0.689        | 0.854        | 0.779         |
|         | Mip-NeRF360 | 0.857        | 0.660        | <b>0.901</b> | 0.900         |
|         | 3D-GS       | 0.879        | 0.802        | 0.899        | 0.906         |
|         | 3D-GS*      | 0.877        | 0.808        | 0.895        | 0.898         |
| S=0.01  | AbsGS-0008  | 0.877        | 0.807        | 0.9009       | 0.903         |
| S=0.001 | AbsGS-0008  | 0.882        | 0.808        | 0.899        | 0.907         |
| S=0.01  | AbsGS-0004  | 0.886        | <b>0.820</b> | 0.900        | <b>0.9072</b> |
| S=0.001 | AbsGS-0004  | <b>0.888</b> | 0.818        | 0.898        | 0.907         |

Table 7: Per-scene quantitative results(PSNR) from the Tanks & Temples and Deep Blending.

|         |             | Truck         | Train         | Dr Johnson    | Playroom     |
|---------|-------------|---------------|---------------|---------------|--------------|
|         | Plenoxels   | 23.221        | 23.221        | 23.142        | 22.980       |
|         | INGP-Base   | 23.260        | 20.170        | 27.750        | 19.483       |
|         | INGP-Big    | 23.383        | 20.456        | 28.257        | 21.665       |
|         | Mip-NeRF360 | 24.912        | 19.523        | 29.140        | 29.657       |
|         | 3D-GS       | 25.187        | 21.097        | 28.766        | 30.044       |
|         | 3D-GS*      | 25.430        | 21.851        | 29.195        | 29.935       |
| S=0.01  | AbsGS-0008  | 25.449        | 21.819        | 29.155        | 29.953       |
| S=0.001 | AbsGS-0008  | 25.57         | 21.51         | 29.195        | <b>30.19</b> |
| S=0.01  | AbsGS-0004  | 25.702        | <b>22.010</b> | 28.930        | 29.967       |
| S=0.001 | AbsGS-0004  | <b>25.735</b> | 21.721        | <b>29.197</b> | 30.141       |



Table 8: Per-scene quantitative results(LPIPS) from the Tanks & Temples and Deep Blending.

|             |            | Truck        | Train        | Dr Johnson   | Playroom     |
|-------------|------------|--------------|--------------|--------------|--------------|
| Plenoxels   |            | 0.335        | 0.422        | 0.521        | 0.499        |
| INGP-Base   |            | 0.274        | 0.386        | 0.381        | 0.465        |
| INGP-Big    |            | 0.249        | 0.360        | 0.352        | 0.428        |
| Mip-NeRF360 |            | 0.159        | 0.354        | 0.237        | 0.252        |
| 3D-GS       |            | 0.148        | 0.218        | 0.244        | 0.241        |
| 3D-GS*      |            | 0.149        | 0.209        | 0.241        | 0.239        |
| S=0.01      | AbsGS-0008 | 0.156        | 0.224        | 0.249        | 0.248        |
| S=0.001     | AbsGS-0008 | 0.152        | 0.214        | 0.242        | 0.240        |
| S=0.01      | AbsGS-0004 | 0.131        | 0.193        | 0.240        | 0.232        |
| S=0.001     | AbsGS-0004 | <b>0.116</b> | <b>0.157</b> | <b>0.156</b> | <b>0.179</b> |

Table 9: Per-scene memory consumption(MB) from the Tanks & Temples and Deep Blending.

|         |            | Truck      | Train      | Dr Johnson | Playroom   |
|---------|------------|------------|------------|------------|------------|
| 3D-GS*  |            | 530        | 218        | 744        | 504        |
| S=0.01  | AbsGS-0008 | 204        | 115        | 328        | 201        |
| S=0.001 | AbsGS-0008 | 233        | 170        | 523        | 237        |
| S=0.01  | AbsGS-0004 | 419        | 210        | 457        | 316        |
| S=0.001 | AbsGS-0004 | <b>386</b> | <b>222</b> | <b>558</b> | <b>330</b> |
